# Supplementary material for: TFEB regulates pluripotency transcriptional network in mouse embryonic stem cells independent of autophagy–lysosomal biogenesis
Source: PubMed Central journal article supplement (PMC8016867; doi:10.1038/s41419-021-03632-9), 2021-04-01
Supplement: 41419_2021_3632_MOESM1_ESM.pdf [file 41419_2021_3632_MOESM1_ESM.pdf]

Supplementary Tables for

**TFEB Regulates Pluripotency Transcriptional Network in  
Mouse Embryonic Stem Cells Independent of  
Autophagy-lysosomal Biogenesis**

Anderson Tan<sup>†</sup>, Renuka Prasad<sup>†</sup> and Eek-hoon Jho<sup>1</sup>

Department of Life science, University of Seoul, Seoul, Republic of Korea, 130-743, Republic of Korea.

<sup>†</sup> These authors contributed equally to this work.

<sup>1</sup> To whom correspondence may be addressed. E-mail: [ej70@uos.ac.kr](mailto:ej70@uos.ac.kr)

Tel: +82-02-6490-2671, Fax: +82-02-6490-2664.

**Supplementary Table 1. Sequences for siRNA and gRNA**

| <b>gRNA sequences for lentiCRISPRv2</b> |                           |
|-----------------------------------------|---------------------------|
| TFEB gRNA-1                             | CACCGCATATTCACACCCGACGGCG |
| TFEB gRNA-2                             | CACCGCAGCCCGATGCGTGACGCCA |
| TFEB gRNA-3                             | CACCGTCGGGCTCCCTGTAGTCGAG |
| TFE3 gRNA-1                             | CACCGACAACGTTCCATGTATCGGG |
| TFE3 gRNA-2                             | CACCGGGCGATTCAACATTAACGAT |
| TFE3 gRNA-3                             | CACCGAGCGTGTAGGGTTCTCGAGG |
| <b>siRNA sequences</b>                  |                           |
| si-GFP sense                            | G TTCAGCGTGTCCGGCGAG      |
| si-GFP antisense                        | CTCGCCGGACACGCTGAAC       |
| si-Oct4 sense                           | GCCGACAACAATGAGAACCTT     |
| si-Oct4 antisense                       | AAGGTTCTCATTGTTGTCGGC     |
| si-Sox2 sense                           | GAAGGAGCACCCGGATTA        |
| si-Sox2 antisense                       | TAATCCGGGTGCTCCTTC        |
| si-Nanog sense                          | GTTAAGACCTGGTTTCAA        |
| si-Nanog antisense                      | TTTGAAACCAGGTCTTAAC       |
| si-TFE3 sense                           | GCCTAACATCAAACGCGAGAT     |
| si-TFE3 antisense                       | ATCTCGCGTTTGATGTTAGGC     |
| si-ATG7 sense                           | CTCAAGCTGATGTGCTGGCTT     |
| si-ATG7 antisense                       | GCCAGCACATCAGCUTGAGTT     |

**Supplementary Table 2. Sequences for ChIP-qPCR**

| <b>Primers used for ChIP-qPCR</b> |                                                             |
|-----------------------------------|-------------------------------------------------------------|
| <b>Nanog promoter</b>             |                                                             |
| T1-F                              | AGAGAGAGAGAGAGAGAGTGGTGTAAA                                 |
| T1-R                              | ATAATTAAACCAGCCATTTCTTTTTTGT                                |
| T2-F                              | GCAGTGGAGACAGTAGTAGTATGGT                                   |
| T2-R                              | GTTATTATTCTAGGCAGGGTTTCTCTG                                 |
| T3-F                              | GCTTAGTCTTTTGTAGAATAAAACCCAG                                |
| T3-R                              | CTTCCTATTTCCACATCCCAAGTTCAAA                                |
| T4-F                              | GAGGATGCCCCCTAAGCTTTCCCTCCC                                 |
| T4-R                              | CCTCCTACCCTACCCACCCCCTATTCTCCC                              |
| Oct4-F                            | GAGGATGCCCCCTAAGCTTTCCCTCCC                                 |
| Oct4-R                            | CCTCCTACCCTACCCACCCCCTATTCTCCC                              |
| <b>Sox2 promoter</b>              |                                                             |
| F                                 | CGGTGAGAAGAGGGGGTGAGTGGGTGCTGGCGACAAGG                      |
| R                                 | GGATACATAAGGGTGGATGGGGCGCGGAAGCTGGGGC                       |
| <b>TFEB promoter</b>              |                                                             |
| Sox2-F                            | CCAGTCTCATGTACTCAGACTGCCAGGCACTG                            |
| Sox2-R                            | CGTATCTGAGACCATGACAGTACAGTTAGGGAC                           |
| Oct4-F                            | CCCAACGGCTAGAGGCCGAAGGTCTAGCAGTAAACAAACAG                   |
| Oct4-R                            | ACCTCCTCCGAGAGACTCTAATGTCACCTCAGAGTGCCATTTTCAGGA<br>CCTGTGC |

|                           |                                                               |
|---------------------------|---------------------------------------------------------------|
| Nanog-F                   | CCCAACGGCTAGAGGCCGAAGGTCTAGCAGTAAACAAACAG                     |
| Nanog-R                   | ACCTCCTCCGAGAGACTCTAATGTCACCTCAGAGTGCCATTTTCAGGA<br>CCACTGTGC |
| <b>Lysosomal promoter</b> |                                                               |
| CLCN7-F                   | GGATTTTGAGTTCTAGGTTTCTACCCTGGGCTGCAACGACC                     |
| CLCN7-R                   | CAAGACACTTTCTTAGAGACGTTGGCCATGGCCCACTGAG                      |
| CTSA-F                    | GGGAACCCTTCTGTCAACACCAAGATCACCTGATCTCTGG                      |
| CTSA-R                    | CCGTACCTCTGCTTCCTTGCGTCCTTGCTCTCCAGGA                         |
| CTSD-F                    | GACCACATCCTGGTAGTGGGCACCCCAATTATGCAAAAA                       |
| CTSD-R                    | ACTCCAGGCCTACGCACGGCTCTCGGGAACG                               |
| LAMP1-F                   | TCACGTGCGGAACGGAGCCTCCCGAAGAAGTGAGGAG                         |
| LAMP1-R                   | TTGCGCGGGCGGCGAGGCCGGCGGGAGGG                                 |
| MCOLN1-F                  | CCTTTTGTTAGAGTTGCTATCGGCACTAGGACCGCGCG                        |
| MCOLN1-R                  | TCACTGCAGCCTCGCTCCCTCCCGGCGCCGCTTCAAA                         |
| TPP1-F                    | GCTCAACACAGCATAGAATTCTAATAGCAGCCCCAGCATTTCAG                  |
| TPP1-R                    | ATGTAATCCCTCTAATGTAATCCCCCTTAGCTACCCTCCCCA                    |

**Supplementary Table 3. Primers for qPCR**

| qPCR primers |                          |
|--------------|--------------------------|
| mATG7-F      | GTTTCGCCCCCTTTAATAGTGC   |
| mATG7-R      | TGAACTCCAACGTCAAGCGG     |
| mUVRAG -F    | GCAGACCACGAGACAGTTGA     |
| mUVRAG -R    | CATCGTGACGTTGCACACAG     |
| mWIP1-F      | CACAGGATGGAGGAGAATGTG    |
| mWIP1-R      | TGCAGCATAAGATGGAGGTAAG   |
| mATG9b -F    | AGCTATCATCAGCGGAATGG     |
| mATG9b -R    | GCGAAGGAGGAAGGTTGTAA     |
| SOX2-F       | CATGAGAGCAAGTACTGGCAAG   |
| SOX2 -R      | CCAACGATATCAACCTGCATGG   |
| OCT4-F       | CCAATCAGCTTGGGCTAGAG     |
| OCT4-R       | CCTGGGAAAGGTGTCCTGTA     |
| NANOG-F      | TCTTCCTGGTCCCCACAGTTT    |
| NANOG-R      | GCAAGAATAGTTCTCGGGATGAA  |
| mTFEB-F      | CGGACAGATTGACCTTCAGAG    |
| mTFEB-R      | GCTGCTGCTGTTGCATATAAT    |
| mTFE3-F      | GGAAACAGAGAAGTCTCCCTTAAA |

|                    |                         |
|--------------------|-------------------------|
| mTFE3-R            | CTGAGTGGGTGGGTTCAATAA   |
| MITF-F             | AGGACCTTGAAAACCGACAG    |
| MITF-R             | GGTGGATGGGATAAGGGAAAG   |
| TFEC-F             | AGTGATACAATATGCCCTTTGG  |
| TFEC-R             | GTTGATGTCTTGAGCCTGTTTG  |
| SOX17-F            | ATACGCCAGTGACGACCAGAG   |
| SOX17-R            | ACCACCTCGCCTTTCACCTTT A |
| OTX2-F             | GCGAAGGGAGAGGACGACTTT   |
| OTX2-R             | CTGCTGTTGGCGGCACTTAG    |
| NEURO D1-F         | TATTGCGTTGCCTTAGCACT    |
| NEURO D1-F         | CATCCTCTTGAGTGTTATGG    |
| GATA4-F            | GAGGGTGAGCCTGTATGTAATG  |
| GATA4-R            | CTAGTGGCATTGCTGGAGTTA   |
| HAND1-F            | CACCACCTACCACCGCAGTA    |
| HAND1-R            | CCTTCTTGGGTCCTGAGCCTTT  |
| BRACHYURY-F        | TCTCTGGTCTGTGAGCAATGGT  |
| BRACHYURY-R        | TGCGTCAGTGGTGTGTAATGTG  |
| m $\beta$ -actin-F | ATGGAGCCACCGATCCACA     |
| m $\beta$ -actin-R | CCGTAAAGACCTCTATGCCAAC  |

|             |                         |
|-------------|-------------------------|
| mATG4b-F    | TATGATACTCTCCGGTTTGCTGA |
| mATG4b-R    | GTTCCCCCAATAGCTGGAAAG   |
| mLAMP1-F    | CAGCACTCTTTGAGGTGAAAAC  |
| mLAMP1-R    | ACGATCTGAGAACCATTGCA    |
| mATP6v0E1-F | GCATACCACGGCCTTACTGT-   |
| mATP6v0E1-R | GAGGATTGAGCTGTGCCAGA    |
| mATP6v1h-F  | ACTCCCCGAGGCTATCCAG     |
| mATP6v1h-R  | CACGAACTTCAGCAGCCTTG    |
| mCSTD-F     | TACTCCATGCAGTCATCGCC    |
| mCSTD-R     | GACGACTGTGAAACACTGCG    |
| mMCOLN1-F   | TCATTGCACTCATCACCGGC    |
| mMCOLN1-R   | CCAGATGTGGGGCTATCCTG    |
| mCLCN7-F    | CACGGCCAGGGAAGTAATGAG   |
| mCLCN7-R    | CGCAGGATCAAGCCTTGGAG    |
| mCTSA-F     | CAGCCCCTTCCAACCTACCTC   |
| mCTSA-R     | CCGTTGTAGAGCAGGATCTGG   |
| hVSP11-F    | AAGAACCTCATGCCACCTCTTC  |
| hVSP11-R    | GGTAGTCCCTGATGACGGAGA   |
| hCTSF-F     | ACAGAGGAGGAGTTCCGCACTA  |

|                    |                         |
|--------------------|-------------------------|
| hCTSF-R            | GCTTGCTTCATCTTGTTGCCA   |
| hLAMP1-F           | ACGTTACAGCGTCCAGCTCAT   |
| hLAMP1-R           | TCTTTGGAGCTCGCATTGG     |
| hATPv0E1-F         | CATTGTGATGAGCGTGTTCTGG  |
| hATPv0E1-R         | AACTCCCCGGTTAGGACCCTTA  |
| hLAMP2-F           | GCCGTTCTCACACTGCTCTA    |
| hLAMP2-R           | TGAAATGCTCCAGACACTGAA   |
| hTFEB-F            | CCAGAAGCGAGAGCTCACAGAT  |
| hTFEB-R            | TGTGATTGTCTTTCTTCTGCCG  |
| hUVRAG-F           | CTGTTTGGATGGGCTGAAAT    |
| hUVRAG-R           | TGCGAACACAGTTCTGATCC    |
| hATG9b-F           | TGTGAGCCAGAAAAACAAGCAAA |
| hATG9b-R           | GGTATGGGGGTGGGGTCTAA    |
| h $\beta$ -actin-F | GAGATCACTGCCCTGGCACC    |
| h $\beta$ -actin-R | GATGGAGGGGCCGGACTCG     |
| hUVRAG -F          | CTGTTTGGATGGGCTGAAAT    |
| hUVRAG -R          | TGCGAACACAGTTCTGATCC    |
